# Supplementary material for: High-quality ultrastructural preservation using cryofixation for 3D electron microscopy of genetically labeled tissues
Source: eLife journal article supplement (doi:10.7554/elife.35524), 2018-05-11
Supplement: supp [file elife-35524-supp-v1.zip]

Archive with 8 entries (8 files):
- elife_poa_e35524_Figure_4_source_data_1.xlsx
- elife_poa_e35524_Figure_2_video_1.avi
- elife_poa_e35524_Figure_3_video_1.avi
- elife_poa_e35524_Figure_2_figure_supplement_1.pdf
- elife_poa_e35524_Figure_4_figure_supplement_1.pdf
- elife_poa_e35524_Transparent_Reporting_File.docx
- elife_poa_e35524_Figure_5_figure_supplement_1.pdf
- elife_poa_e35524_Figure_5_video_1.mp4
