# Supplementary material for: High-quality ultrastructural preservation using cryofixation for 3D electron microscopy of genetically labeled tissues
Source: eLife journal article supplement (doi:10.7554/elife.35524), 2018-05-11
Supplement: supp [file elife-35524-supp-v1.zip › elife_poa_e35524_Figure_4_source_data_1.xlsx]

## Sheet: Sheet1
Image file	Cell	Area	Mean	Low	Top	Mean-background			Cell	Area	Mean	Low	Top	Mean-background			Cell	Area	Mean	Low	Top	Mean-background
Control-1	1	27.976	282.412	105	639	217.297		Control-2	1	24.921	461.237	94	1926	383.694		Control-3	1	16.89	209.055	88	417	148.402
16 bit	2	23.159	224.688	75	486	159.573		16 bit	2	25.578	306.177	99	1000	228.634		16 bit	2	20.953	234.094	78	981	173.441
	3	23.955	819.783	140	3679	754.668			3	25.674	221.561	85	481	144.018			3	22.205	396.373	107	821	335.72
	4	26.671	248.702	71	652	183.587			4	20.221	185.301	68	404	107.758			4	28.803	310.358	70	1439	249.705
	5	24.867	334.125	106	665	269.01			5	29.482	426.142	115	1129	348.599			5	22.82	257.689	78	569	197.036		control	392.489
	6	20.571	319.434	103	891	254.319			6	19.574	574.575	146	1426	497.032			6	26.438	316.6	73	706	255.947		HPF	428.819
	7	22.311	501.848	113	2008	436.733			7	12.296	825.25	171	2335	747.707			7	24.687	228.267	101	424	167.614
	8	32.58	670.03	135	3511	604.915			8	31.137	735.904	139	3707	658.361			8	30.331	491.613	138	1911	430.96
	9	17.982	207.765	93	494	142.65			9	28.963	740.831	135	2994	663.288			9	21.939	246.368	82	468	185.715
	10	18.735	310.652	77	781	245.537			10	27.35	456.458	110	1665	378.915			10	24.963	860.526	142	3709	799.873
	11	23.34	754.966	116	3484	689.851			11	39.763	368.482	119	1012	290.939			11	35.901	398.249	136	884	337.596
	12	18.82	265.586	113	627	200.471			12	31.233	283.456	96	589	205.913			12	32.453	468.426	110	1542	407.773
	13	22.968	773.879	140	2517	708.764			13	23.955	212.485	99	447	134.942			13	27.382	516.162	124	1981	455.509
	14	19.319	782.594	154	2459	717.479			14	23.838	185.028	82	351	107.485			14	22.831	890.508	167	2912	829.855
	15	12.794	795.567	295	1707	730.452			15	14.29	597.512	111	2227	519.969			15	27.859	1144.38	115	4095	1083.73
	16	22.12	430.554	169	1419	365.439			16	26.947	419.251	115	1947	341.708			16	31.297	774.889	153	2324	714.236
	17	17.197	244.967	104	618	179.852			17	25.101	583.208	108	2825	505.665			17	31.859	1034.13	118	4035	973.48
	18	18.046	548.807	141	2128	483.692			18	28.124	403.067	98	1197	325.524			18	30.204	830.988	154	3426	770.335
	19	21.133	332.499	91	729	267.384			19	18.842	313.167	124	554	235.624			19	24.857	722.16	142	2696	661.507
	20	21.313	678.774	152	2238	613.659			20	31.403	540.808	105	1809	463.265			20	21.451	341.889	133	730	281.236
	21	16.826	573.163	158	2029	508.048			21	21.642	681.396	109	2296	603.853			21	16.508	316.994	100	610	256.341
	22	21.313	1095.47	238	2483	1030.36			22	18.258	925.985	149	3899	848.442			22	26.31	280.797	103	623	220.144
	23	26.045	726.552	225	3200	661.437			23	24.857	712.287	156	2215	634.744			23	34.437	403.973	108	941	343.32
	24	32.379	795.483	125	3306	730.368			24	20.444	618.484	140	2349	540.941			24	36.622	332.612	78	815	271.959
	25	24.263	461.423	142	1696	396.308			25	17.431	300.925	123	612	223.382			25	22.077	666.468	201	2093	605.815
	26	21.536	223.49	110	497	158.375			26	24.91	239.358	82	871	161.815
	27	27.743	462.752	110	1829	397.637			27	34.904	652.653	145	2611	575.11
	28	23.945	370.127	114	843	305.012			28	33.599	242.595	99	630	165.052
	29	25.759	502.243	121	2598	437.128			29	25.525	308.323	106	755	230.78
	30	22.152	305.818	93	577	240.703			30	30.999	616.661	124	3368	539.118
	31	15.882	280.072	107	624	214.957			31	8.126	171.59	85	341	94.0467
	32	8.264	281.625	100	514	216.51			32	17.855	233.173	94	457	155.63
	33	8.148	360.234	166	739	295.119			33	22.194	226.469	77	505	148.926
	34	7.15	328.469	136	635	263.354			34	31.434	596.945	163	2045	519.402
	35	21.589	338.395	124	876	273.28			35	13.675	207.469	86	420	129.926
	36	18.46	532.489	131	1830	467.374			36	22.926	210.085	80	421	132.542
	37	26.342	361.228	101	1519	296.113			37	28.75	337.204	129	629	259.661
	38	29.111	553.003	140	1533	487.888			38	24.39	166.823	77	339	89.2797
	39	42.383	240.36	92	819	175.245			39	36.431	452.225	84	2602	374.682
	40	31.403	547.755	115	2462	482.64
	41	20.772	827.346	150	3087	762.231
	42	33.959	592.371	154	2079	527.256
	43	23.499	607.654	148	1877	542.539
	44	27.817	390.285	85	1397	325.17
	45	23.096	214.486	87	498	149.371
	46	36.378	280.938	102	892	215.823
	47	23.414	352.053	136	914	286.938
	48	26.512	419.732	120	1672	354.617
	49	20.879	678.536	180	2849	613.421
	50	20.953	173.767	65	400	108.652
	51	15.935	178.539	87	393	113.424
	Background								Background								Background
	3	62.901	67.475	50	146				3	62.901	76.804	52	235				3	62.901	59.561	49	108
	4	62.901	64.944	49	124				4	62.901	83.734	55	269				4	62.901	61.325	50	108
	5	62.901	62.925	49	132				5	62.901	72.092	53	173				5	62.901	61.072	50	138
		average	65.1147							average	77.5433							average	60.6527
HPF-1	1	19.987	849.568	204	3237	711.816			1	17.728	338.133	163	1004	228.7			1	16.455	416.027	213	718	342.488
16 bit	2	20.444	1250.04	233	4095	1112.29			2	14.598	367.955	176	1268	258.522			2	21.823	1813.07	363	4095	1739.53
	3	18.057	770.088	187	2642	632.336			3	11.829	225.289	122	393	115.856			3	22.47	1209.9	283	4095	1136.36
	4	18.301	662.864	171	2228	525.112			4	18.757	199.941	108	400	90.5077			4	16.932	328.356	177	584	254.817
	5	18.163	687.083	201	2646	549.331			5	18.523	196.658	131	324	87.2247			5	30.331	1336.65	228	4095	1263.11
	6	20.39	583.399	173	2436	445.647			6	19.011	188.66	121	324	79.2267			6	14.375	714.483	265	2492	640.944
	7	14.343	319.546	182	1029	181.794			7	29.854	190.384	126	355	80.9507			7	20.115	1021.34	292	3861	947.799
	8	12.561	395.474	200	846	257.722			8	25.058	226.305	140	442	116.872			8	14.884	740.569	207	1978	667.03
	9	20.253	547.393	200	2235	409.641			9	25.907	268.055	152	551	158.622			9	15.309	522.159	175	1690	448.62
	10	17.95	427.457	171	1562	289.705			10	15.383	265.571	148	533	156.138			10	19.478	1010.75	256	2875	937.206
	11	27.859	610.746	196	2411	472.994			11	9.93	352.048	171	567	242.615			11	16.179	493.847	171	2496	420.308
	12	16.677	290.894	174	492	153.142			12	8.275	276.737	159	416	167.304			12	14.63	319.978	205	587	246.439
	13	17.59	330.861	175	1218	193.109			13	18.873	404.938	136	1482	295.505			13	16.911	521.698	210	1427	448.159
	14	24.39	791.369	271	2323	653.617			14	16.614	347.611	176	671	238.178			14	15.118	453.609	211	1336	380.07
	15	20.836	601.424	282	1009	463.672			15	19.669	421.028	191	879	311.595			15	16.89	217.057	132	370	143.518
	16	26.565	815.967	234	3331	678.215			16	13.643	241.668	141	430	132.235			16	20.688	249.142	152	492	175.603
	17	21.886	311.622	162	548	173.87			17	16.306	324.703	199	555	215.27			17	16.879	707.913	218	2226	634.374
	18	15.967	408.726	223	983	270.974											18	12.911	792.952	263	3105	719.413
	19	18.576	450.995	269	787	313.243											19	15.839	930.192	263	2802	856.653
	20	17.144	471.233	199	1943	333.481											20	15.521	323.535	174	548	249.996
	21	29.61	231.618	147	468	93.8657											21	11.755	299.043	152	508	225.504
	22	19.054	361.617	208	672	223.865
	23	20.942	779.417	264	1791	641.665
	24	21.303	880.205	279	3163	742.453
	25	21.207	463.832	255	957	326.08
	26	20.815	405.505	225	1156	267.753
	27	17.972	1040.35	257	3926	902.6
	Background								Background								Background
	1	62.901	128.234	87	241				3	62.901	117.618	78	224				3	62.901	74.282	55	182
	2	62.901	118.454	76	226				4	62.901	107.167	73	257				4	62.901	72.55	56	187
	3	62.901	166.569	105	321				5	62.901	103.515	68	265				5	62.901	73.785	55	215
		average	137.752							average	109.433							average	73.539

## Sheet: Sheet2
Fresh antennae			CryoChem Method-processed antennae
Cell	GFP fluorescence intensities (background subtracted)		Cell	GFP fluorescence intensities (background subtracted)
1	217.297		1	711.816
2	159.573		2	1112.29
3	754.668		3	632.336
4	183.587		4	525.112
5	269.01		5	549.331
6	254.319		6	445.647
7	436.733		7	181.794
8	604.915		8	257.722
9	142.65		9	409.641
10	245.537		10	289.705
11	689.851		11	472.994
12	200.471		12	153.142
13	708.764		13	193.109
14	717.479		14	653.617
15	730.452		15	463.672
16	365.439		16	678.215
17	179.852		17	173.87
18	483.692		18	270.974
19	267.384		19	313.243
20	613.659		20	333.481
21	508.048		21	93.8657
22	1030.36		22	223.865
23	661.437		23	641.665
24	730.368		24	742.453
25	396.308		25	326.08
26	158.375		26	267.753
27	397.637		27	902.6
28	305.012		28	228.7
29	437.128		29	258.522
30	240.703		30	115.856
31	214.957		31	90.5077
32	216.51		32	87.2247
33	295.119		33	79.2267
34	263.354		34	80.9507
35	273.28		35	116.872
36	467.374		36	158.622
37	296.113		37	156.138
38	487.888		38	242.615
39	175.245		39	167.304
40	482.64		40	295.505
41	762.231		41	238.178
42	527.256		42	311.595
43	542.539		43	132.235
44	325.17		44	215.27
45	149.371		45	342.488
46	215.823		46	1739.53
47	286.938		47	1136.36
48	354.617		48	254.817
49	613.421		49	1263.11
50	108.652		50	640.944
51	113.424		51	947.799
52	383.694		52	667.03
53	228.634		53	448.62
54	144.018		54	937.206
55	107.758		55	420.308
56	348.599		56	246.439
57	497.032		57	448.159
58	747.707		58	380.07
59	658.361		59	143.518
60	663.288		60	175.603
61	378.915		61	634.374
62	290.939		62	719.413
63	205.913		63	856.653
64	134.942		64	249.996
65	107.485		65	225.504
66	519.969		Mean	428.819
67	341.708		SEM	40.9586
68	505.665
69	325.524
70	235.624
71	463.265
72	603.853
73	848.442
74	634.744
75	540.941
76	223.382
77	161.815
78	575.11
79	165.052
80	230.78
81	539.118
82	94.0467
83	155.63
84	148.926
85	519.402
86	129.926
87	132.542
88	259.661
89	89.2797
90	374.682
91	148.402
92	173.441
93	335.72
94	249.705
95	197.036
96	255.947
97	167.614
98	430.96
99	185.715
100	799.873
101	337.596
102	407.773
103	455.509
104	829.855
105	1083.73
106	714.236
107	973.48
108	770.335
109	661.507
110	281.236
111	256.341
112	220.144
113	343.32
114	271.959
115	605.815
Mean	392.489
SEM	21.3723
