# Supplementary figures and images for: High-quality ultrastructural preservation using cryofixation for 3D electron microscopy of genetically labeled tissues
Source: eLife journal article supplement (doi:10.7554/elife.35524), 2018-05-11

# Figure 2-figure supplement 1

Cultured mammalian cells (TEM)

CryoChem

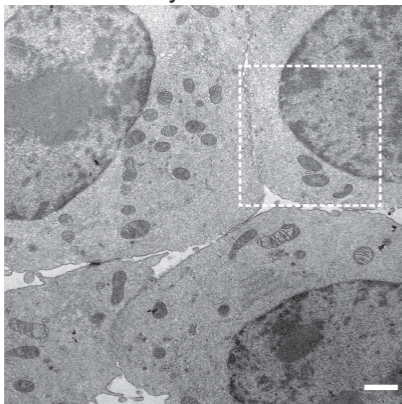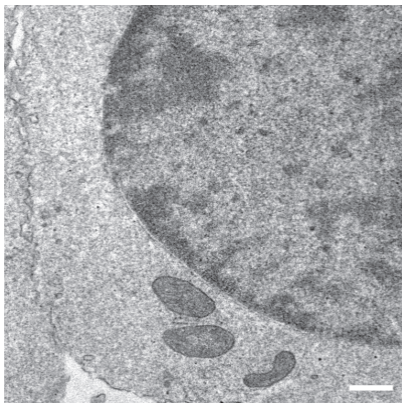

Supplement: supp [file elife-35524-supp-v1.zip › elife_poa_e35524_Figure_2_figure_supplement_1.pdf]

Figure 4-figure supplement 1

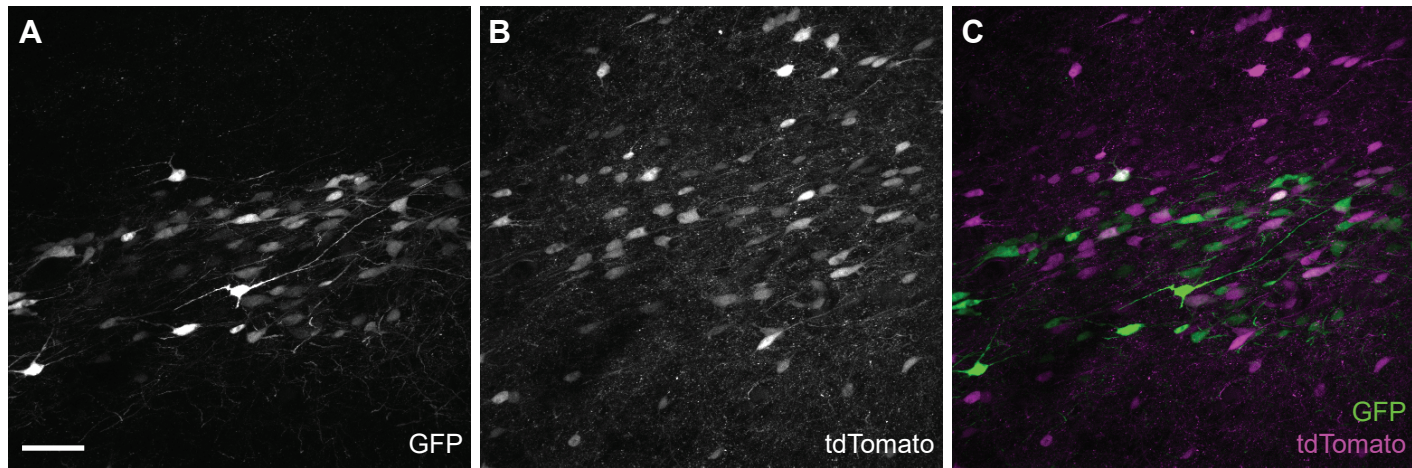

Supplement: supp [file elife-35524-supp-v1.zip › elife_poa_e35524_Figure_4_figure_supplement_1.pdf]

Figure 5-figure supplement 1

DRAQ5

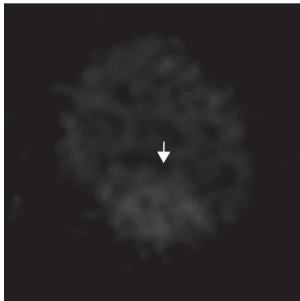

SBEM

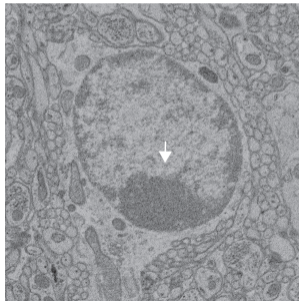

Overlay

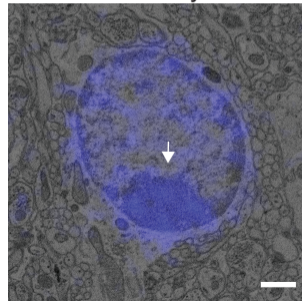

Supplement: supp [file elife-35524-supp-v1.zip › elife_poa_e35524_Figure_5_figure_supplement_1.pdf]
